# Supplementary material for: Revealing the Complete Chloroplast Genome of an Andean Horticultural Crop, Sweet Cucumber (Solanum muricatum), and Its Comparative Analysis with Other Solanaceae Species
Source: Preprints.org preprint supplement (doi:10.20944/preprints202205.0225.v1), 2022-05-17
Supplement: Supplementary file 1 [file supplementary]

## Sheet: Table S1
Table S1. List of genes identified in chloroplast genome of Solanum muricatum
Category	Function	Genes
RNA genes	Transfer RNA	trnH-GUG, trnK-UUUb, trnQ-UUG, trnS-GCU, trnG-UCCb, trnR-UCU, trnC-GCA, trnD-GUC, trnY-GUA, trnE-UUC, trnT-GGU, trnS-UGA, trnG-GCC, trnfM-CAU, trnS-GGA, trnT-UGU, trnL-UAAb, trnF-GAA, trnV-UACb, trnM-CAU, trnW-CCA, trnP-UGG, trnI-CAU (x2), trnL-CAA (x2), trnV-GAC (x2), trnI-GAUb (x2), trnA-UGCb (x2), trnR-ACG (x2), trnN-GUU (x2), trnL-UAG
	Ribosomal RNA	rrn23 (x2), rrn16 (x2), rrn5 (x2), rrn4.5(x2)
Transcription and translation related genes	Transcription and splicing	rpoA, rpoB, rpoC1b, rpoC2
	Ribosomal protein large subunit	rpl2b (x2), rpl14, rpl16b, rpl20, rpl22, rpl23 (x2), rpl32, rpl33, rpl36
	Ribosomal protein small subunit	rps2, rps3, rps4, rps7 (x2), rps8, rps12c (x2), rps11, rps14, rps15, rps16b, rps18, rps19
Photosynthesis	ATP synthase	atpA, atpB, atpE, atpFb, atpH, atpI
	Photosystem I	psaA, psaB, psaC, psaI, psaJ
	Photosystem II	psbA, psbB, psbC, psbD, psbE, psbF, psbH, psbI, psbJ, psbK, psbL, psbM, psbN, psbT, psbZ
	Cytochrome complex	petA, petBb, petD, petG, petL, petN
	Calvin cycle	rbcL
	NADH dehydrogenase	ndhAb, ndhBb (x2), ndhC, ndhD, ndhE, ndhF, ndhG, ndhH, ndhI, ndhJ, ndhK
Miscellaneous group	Translation initiation factor IF1	infA
	Acetyl-CoA carboxylase	accD
	Maturase	matK
	ATP-dependent protease	ClpP1a
	Inner membrane protein	cemA
	Cytochrome c biogenesis	ccsA
Other genes	Conserved hypothetical chloroplast ORF	ycf1, pseudogen ycf1, ycf2 (x2), ycf3a, ycf4, ycf15 (x2)
a Gene containing two introns;
b Gene containing a single intron;
c Gene divided into two independent transcription units

## Sheet: Table S2
Table S2. The codon-anticondon recognition pattern and codon usage in the chloroplast genome of Solanum muricatum
Amino Acid	Codon	Count*	RSCU	tRNA	Amino Acid	Codon	Count*	RSCU	tRNA
Phe(F)	UUU	947	1.28		Gly(G)	GGU	558	1.25
Phe(F)	UUC	529	0.72	trnF-GAA	Gly(G)	GGC	203	0.45	trnG-GCC
Leu(L)	UUA	849	1.43	trnL-UAA	Gly(G)	GGA	711	1.59	trnG-UCC
Leu(L)	UUG	571	1.23	trnL-CAA	Gly(G)	GGG	320	0.71
Leu(L)	CUU	606	1.31		Pro(P)	CCU	417	1.51
Leu(L)	CUC	193	0.42		Pro(P)	CCC	203	0.73
Leu(L)	CUA	383	0.82	trnL-UAG	Pro(P)	CCA	329	1.19	trnP-UGG
Leu(L)	CUG	184	0.4		Pro(P)	CCG	158	0.57
Ile(I)	AUU	1091	1.48	trnI-CAU	Thr(T)	ACU	526	1.57
Ile(I)	AUC	444	0.6	trnI-GAU	Thr(T)	ACC	260	0.78	trnT-GGU
Ile(I)	AUA	670	0.91		Thr(T)	ACA	401	1.2	trnT-UGU
Met(M)	AUG	611	1	trnM-CAU, trnfM-CAU	Thr(T)	ACG	150	0.45
Val(V)	GUU	520	1.45		Ala(A)	GCU	619	1.76
Val(V)	GUC	179	0.5	trnV-GAC	Ala(A)	GCC	242	0.69
Val(V)	GUA	536	1.5	trnV-UAC	Ala(A)	GCA	403	1.15	trnA-UGC
Val(V)	GUG	197	0.55		Ala(A)	GCG	139	0.4
Cys(C)	UGU	219	1.47		Tyr(Y)	UAU	773	1.61
Cys(C)	UGC	79	0.53	trnC-GCA	Tyr(Y)	UAC	186	0.39	trnY-GUA
Stop	UGA	16	0.56		Stop	UAA	48	1.67
Trp(W)	UGG	482	1	trnW-CCA	Stop	UAG	22	0.77
Arg(R)	CGU	346	1.31	trnR-ACG	His(H)	CAU	474	1.54
Arg(R)	CGC	99	0.38		His(H)	CAC	140	0.46	trnH-GUG
Arg(R)	CGA	376	1.43		Gln(Q)	CAA	700	1.5	trnQ-UUG
Arg(R)	CGG	111	0.42		Gln(Q)	CAG	231	0.5
Arg(R)	AGA	479	1.82	trnR-UCU	Asn(N)	AAU	964	1.51
Arg(R)	AGG	169	0.64		Asn(N)	AAC	311	0.49	trnN-GUU
Ser(S)	UCU	581	1.7		Lys(K)	AAA	1038	1.47	trnK-UUU
Ser(S)	UCC	335	0.98	trnS-GGA	Lys(K)	AAG	372	0.53
Ser(S)	UCA	407	1.19	trnS-UGA	Asp(D)	GAU	834	1.59
Ser(S)	UCG	199	0.58		Asp(D)	GAC	212	0.41	trnD-GUC
Ser(S)	AGU	404	1.18		Glu(E)	GAA	1005	1.48	trnE-UUC
Ser(S)	AGC	120	0.35	trnS-GCU	Glu(E)	GAG	354	0.52
*Frequency of usage of each codon in 26,235 codons in 88 protein-coding genes
RSCU, relative synonymous codon usage

## Sheet: TableS3
Table S3. Number of different SSRs types in S. muricatum and other seven solanaceae species
Specie	Mononucleotide	Dinucleotide	Trinucleotide	Tetranucleotide	Pentanucleotide	Hexanucleotide	Total
Solanum bulbocastanum	31	6	2	8	1	1	49
Solanum dulcamara	36	8	1	8	1	0	54
Solanum etuberosum	34	6	1	8	0	0	49
Solanum lycopersicum	40	6	1	7	1	0	55
Solanum muricatum	32	5	3	6	1	1	48
Solanum peruvianum	33	6	1	7	1	0	48
Solanum phureja	29	5	2	7	1	0	44
Solanum tuberosum	31	5	1	8	1	0	46
