# Supplementary figures and images for: Revealing the Complete Chloroplast Genome of an Andean Horticultural Crop, Sweet Cucumber (Solanum muricatum), and Its Comparative Analysis with Other Solanaceae Species
Source: Preprints.org preprint supplement (doi:10.20944/preprints202205.0225.v1), 2022-05-17

IRA/IRB

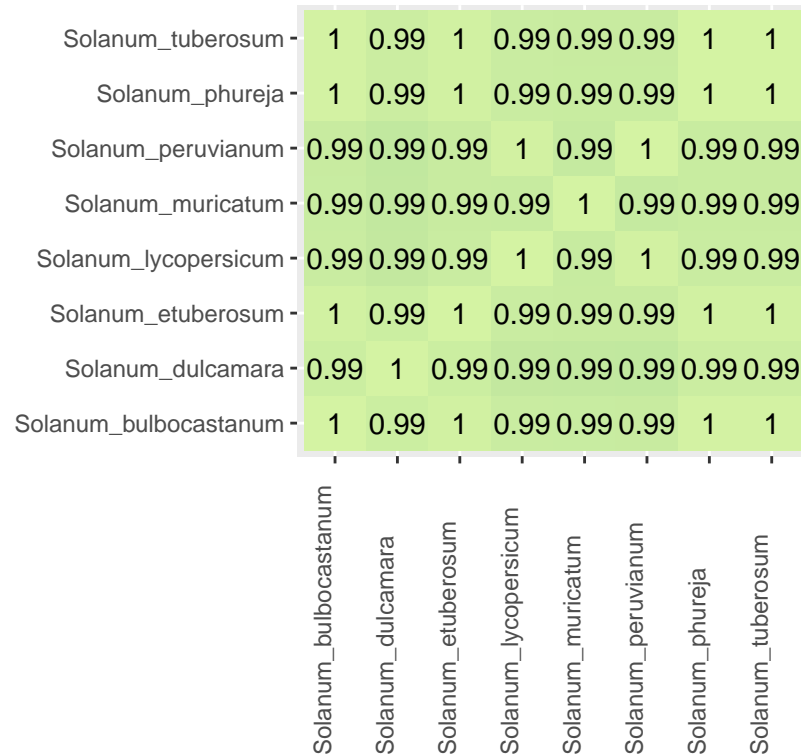

LSC

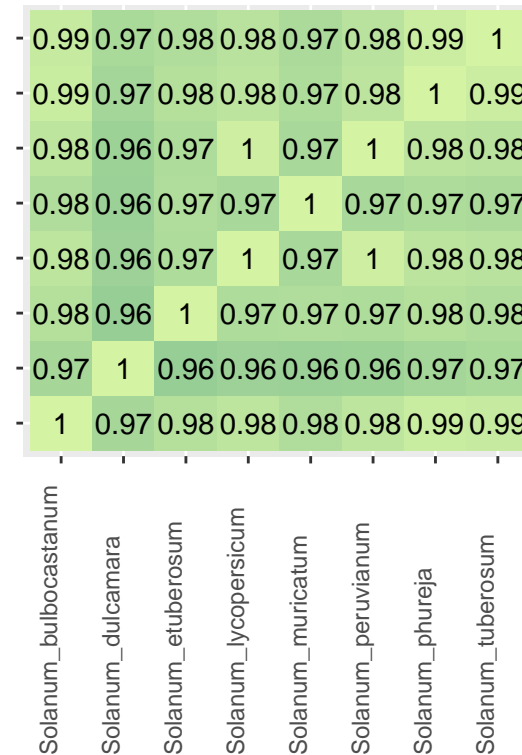

SSC

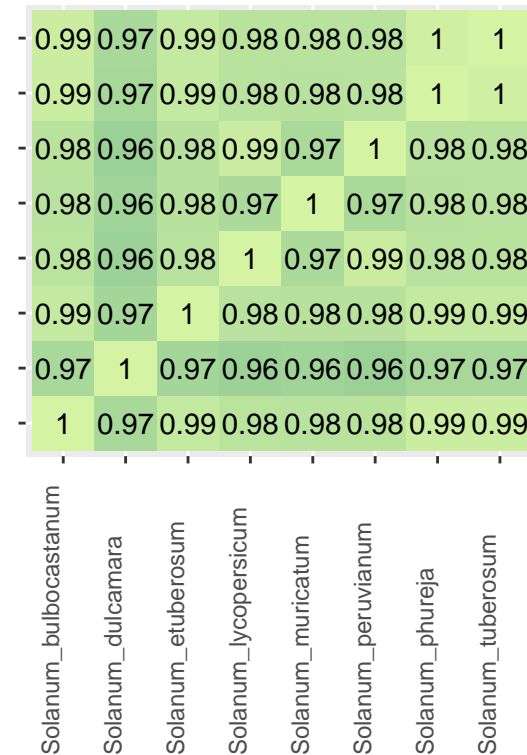

Identity

0.8

0.9

1.0

Supplement: Supplementary file 2 [file supplementary]
